# Supplementary material for: Dominance relationships and coalitionary aggression against conspecifics in female carrion crows
Source: PubMed Central journal article supplement (PMC6828704; doi:10.1038/s41598-019-52177-7), 2019-11-04
Supplement: 41598_2019_52177_MOESM3_ESM.pdf [file 41598_2019_52177_MOESM3_ESM.pdf]

**Supplementary materials  
for**

**Dominance relationships and coalitionary aggression against  
conspecifics in female carrion crows**

Benedikt Holtmann <sup>1,2\*</sup>, Julia Buskas <sup>3</sup>, Matthew Steele <sup>3</sup>, Kristaps Sokolovskis <sup>3</sup>, Jochen B. W.  
Wolf <sup>1,3</sup>

<sup>1</sup> Division of Evolutionary Biology, Department of Biology, LMU Munich, Großhaderner Straße  
2, 82152 Planegg-Martinsried, Germany

<sup>2</sup> Behavioural Ecology Group, Department of Biology, LMU Munich, Großhaderner Straße 2,  
82152 Planegg-Martinsried, Germany

<sup>3</sup> Department of Ecology and Genetics, Evolutionary Biology Centre, Uppsala University,  
Norbyvägen 14-18, 75236 Uppsala, Sweden

**\*Author for correspondence:**

Benedikt Holtmann, Email: [holtmann@biologie.uni-muenchen.de](mailto:holtmann@biologie.uni-muenchen.de)

**Table of contents**

|                              |           |
|------------------------------|-----------|
| <b>Supplementary methods</b> | <b>2</b>  |
| <b>Supplementary tables</b>  | <b>3</b>  |
| <b>Supplementary figures</b> | <b>8</b>  |
| <b>References</b>            | <b>10</b> |

## Supplementary methods

### Dominance hierarchies using David's score

In addition to Elo-ratings, we constructed dominance hierarchies on the basis of David's scores<sup>1,2</sup>. This alternative dominance measure is based on interactions matrices containing the total numbers of wins and losses of certain observation periods. Therefore, David's scores are independent of the sequence of interactions. We used the *DS* function within the *EloRating* package<sup>3</sup> in *R*<sup>4</sup> to calculate David's scores. To account for differences in the number of interactions between individuals resulting from individuals preferring or avoiding contact with certain conspecifics, we corrected David's scores for the number of interactions in a dyad<sup>5</sup>. David's scores were highly correlated with dominance ranks obtained from Elo-rating (Pearson correlation:  $r = 0.97$ ,  $p < 0.001$ ; **Table S4**, Additional file 1). We therefore only present dominance hierarchies obtained from randomized Elo-rating.

## Supplementary tables

**Table S1** Overview of carrion crow females that were housed together and video recorded between July and October 2015.

| <b>ID</b> | <b>ColourID</b> | <b>Colour bands</b> | <b>Species</b>       | <b>Sex</b> | <b>Comments</b>                                                                                                            |
|-----------|-----------------|---------------------|----------------------|------------|----------------------------------------------------------------------------------------------------------------------------|
| C27       | Grey            | Black-Black         | <i>Corvus corone</i> | Female     | C27 re-joined the group on the 22 <sup>nd</sup> of September after having been isolated for a period for reasons of health |
| C29       | Blue            | White-White         | <i>Corvus corone</i> | Female     | -                                                                                                                          |
| C45       | Red             | Blue-Blue           | <i>Corvus corone</i> | Female     | -                                                                                                                          |
| C58       | Green           | Blue-Green          | <i>Corvus corone</i> | Female     | -                                                                                                                          |
| C59       | Yellow          | Orange-Orange       | <i>Corvus corone</i> | Female     | -                                                                                                                          |

**Table S2** Days of sampling and length of video recordings

| <b>Date</b> | <b>Time video started<br/>(hh:mm)</b> | <b>Length of video<br/>(hh:mm)</b> | <b>Crows present</b>       |
|-------------|---------------------------------------|------------------------------------|----------------------------|
| 15/07/2015  | 08:00                                 | 04:30                              | C29, C45, C58, C59         |
| 18/08/2015  | 08:15                                 | 02:20                              | C29, C45, C58, C59         |
| 22/09/2015  | 11:45                                 | 02:55                              | C27, C29, C45, C58,<br>C59 |
| 10/10/2015  | 12:10                                 | 03:26                              | C27, C29, C45, C58,<br>C59 |
| 31/10/2015  | 11:25                                 | 02:53                              | C27, C29, C45, C58,<br>C59 |

**Table S3** Ethogram of affiliative and aggressive behaviours displayed by the observed female carrion crows. Behaviours were categorized following <sup>6,7</sup>.

| <b>Type of interaction</b> | <b>Behaviour</b>                   | <b>Description</b>                                                                                                                                                                                                                                 |
|----------------------------|------------------------------------|----------------------------------------------------------------------------------------------------------------------------------------------------------------------------------------------------------------------------------------------------|
| <b>Affiliative</b>         | Allopreening (directed)            | One individual preens or touches the feathers of another with its beak                                                                                                                                                                             |
|                            | Seeking proximity (directed)       | One bird approaches another individual with the intention to sit in physical contact (within the reach of the bill) to its “partner” or to check what the other bird is doing                                                                      |
|                            | Dual exploration (mutual)          | Two birds explore the same area and/or food items                                                                                                                                                                                                  |
|                            | Dual foraging (mutual)             | Two birds feed in close vicinity (sometimes from the same food item)                                                                                                                                                                               |
|                            | Displaying (mutual)                | Two individuals engage in a series of calling, bowing and tail-fanning<br><br>For more details, please see the subsection ‘ <i>Recruitment</i> ’ within the section ‘Coalitionary attacks and vocal communication’ of the results in the main text |
| <b>Aggressive</b>          | Aggression                         | One bird pecks, feather-pulls, or jabs after another individual                                                                                                                                                                                    |
|                            | Displacement (direct and indirect) | One individual approaches and causes another individual to retreat or to move from its position.                                                                                                                                                   |

| Type of interaction | Behaviour | Description                                                                                                                                                                                |
|---------------------|-----------|--------------------------------------------------------------------------------------------------------------------------------------------------------------------------------------------|
|                     |           | Sometimes these interactions involved threatening gestures as well as vocalizations, such as “bristle-head posture”, (von Blotzheim Handbuch der Vögel Mitteleuropas), or aggressive calls |
|                     | Chase     | One individual chases and tries to catch another bird.                                                                                                                                     |
|                     | Attack    | One bird attacks another in the air or on the ground                                                                                                                                       |

**Table S4** Randomized elo-scores and David's scores estimated from pairwise interactions for each female carrion crows and observation day. The higher the score, the higher is the dominance of the bird within the group.

| <b>Date</b> | <b>Individual</b> | <b>Randomized elo-scores</b> | <b>David's scores</b> |
|-------------|-------------------|------------------------------|-----------------------|
| 15/07/15    | C45               | 1340.2                       | 5.524                 |
| 15/07/15    | C59               | 1043.3                       | 0.861                 |
| 15/07/15    | C29               | 934.7                        | -0.990                |
| 15/07/15    | C58               | 658.4                        | -5.394                |
| 18/08/15    | C45               | 1156.6                       | 4.241                 |
| 18/08/15    | C29               | 988.4                        | 0.687                 |
| 18/08/15    | C59               | 1040.2                       | 0.247                 |
| 18/08/15    | C58               | 713.5                        | -5.175                |
| 22/09/15    | C45               | 1362                         | 8.565                 |
| 22/09/15    | C59               | 1172.8                       | 4.250                 |
| 22/09/15    | C29               | 877.3                        | -4.126                |
| 22/09/15    | C27               | 787.2                        | -4.479                |
| 22/09/15    | C58               | 801.6                        | -4.210                |
| 10/10/15    | C45               | 1271.9                       | 7.544                 |
| 10/10/15    | C59               | 1097.6                       | 4.119                 |
| 10/10/15    | C58               | 929                          | -3.063                |
| 10/10/15    | C29               | 859.6                        | -4.580                |
| 10/10/15    | C27               | 742.8                        | -4.020                |
| 31/10/15    | C45               | 1508                         | 9.461                 |
| 31/10/15    | C59               | 1197.8                       | 4.716                 |
| 31/10/15    | C29               | 801.4                        | -1.012                |
| 31/10/15    | C58               | 724.7                        | -5.023                |
| 31/10/15    | C27               | 678.1                        | -8.141                |
| 15/07/15    | C45               | 1340.2                       | 5.524                 |
| 15/07/15    | C59               | 1043.3                       | 0.861                 |

## Supplementary figures

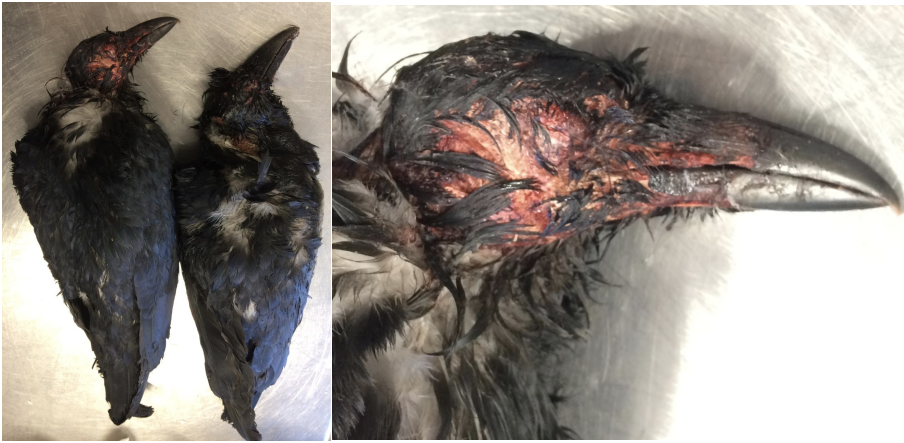

**Fig. S1** The two carrion females (C27 and C58) that were found dead at the 1<sup>st</sup> of November and 3<sup>rd</sup> of November 2015, respectively. The left picture shows the two corpses of individual C58 (left) and C27 (right) that were sent to the National Veterinary Institute of Sweden for necropsy. Necropsies concluded that the two individuals very likely died due to traumatic injuries. The right picture shows a close up of C58's head injuries likely resulting from the coalitionary attack of individuals C45 and C59.



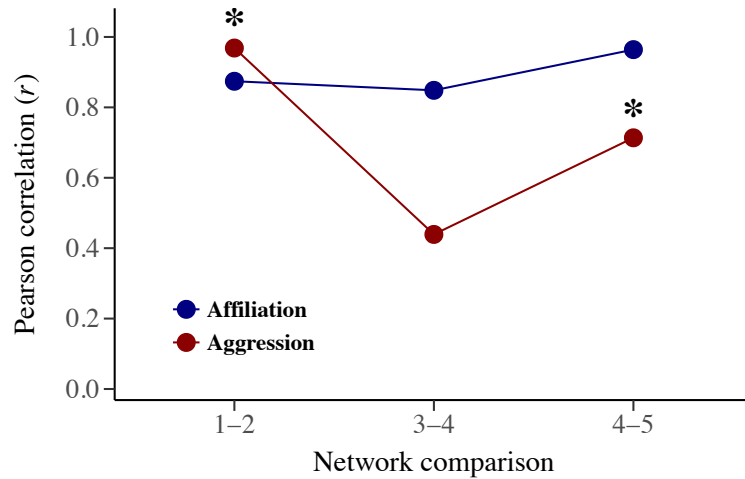

**Fig. S2** Stability of affiliative (blue) and aggressive (red) networks over time. Correlations between two sequential networks (observation days) were obtained by comparing network matrix structure using quantitative assignment procedure (QAP) correlation tests. Network structures for aggressive interactions were significantly correlated for recordings 1-2 and 4-5 ( $P < 0.05$ ). None of the affiliate matrix correlations were statistically significant ( $P > 0.05$ ). The figure was created using the *R* package *ggplot2*<sup>8</sup>.

## References

- 1 David, H. A. Ranking from unbalanced paired-comparison data. *Biometrika* **74**, 432-436, doi:<https://doi.org/10.1093/biomet/74.2.432> (1987).
- 2 Gammell, M. P., de Vries, H., Jennings, D. J., Carlin, C. o. M. & Hayden, T. J. David's score: a more appropriate dominance ranking method than Clutton-Brock et al.'s index. *Anim Behav* **66**, 601-605, doi:<https://doi.org/10.1006/anbe.2003.2226> (2003).
- 3 Neumann, C. & Kulik, L. EloRating: animal dominance hierarchies by elo rating. *R package version 0.43*, <https://CRAN.R-project.org/package=EloRating> (2014).
- 4 R: A language and environment for statistical computing (R Foundation for Statistical Computing, Vienna, Austria, 2018).
- 5 de Vries, H., Stevens, J. M. G. & Vervaecke, H. Measuring and testing the steepness of dominance hierarchies. *Anim Behav* **71**, 585-592, doi:<https://doi.org/10.1016/j.anbehav.2005.05.015> (2006).
- 6 Seed, A. M., Clayton, N. S. & Emery, N. J. Postconflict third-party affiliation in rooks, *Corvus frugilegus*. *Curr Biol* **17**, 152-158, doi:<https://doi.org/10.1016/j.cub.2006.11.025> (2007).
- 7 Kondo, N. & Hiraiwa-Hasegawa, M. The influence of social dominance on calling rate in the large-billed crow (*Corvus macrorhynchos*). *J Ornithol* **156**, 775-782, doi:<https://doi.org/10.1007/s10336-015-1191-8> (2015).
- 8 Wickham, H. *ggplot2: Elegant graphics for data analysis*. (Springer, 2016).
